# Supplementary material
Source: MDPI journal article supplement (https://www.mdpi.com/2073-4395/11/7/1436)
Supplement: s1 [file s1]

# Supplementary Materials: Canopy temperature as a key physiological trait to improve yield prediction under water restrictions in potato

Johan Ninanya <sup>1,2</sup> , David A. Ramírez <sup>1,2,\*</sup> , Javier Rinza <sup>1</sup> , Cecilia Silva-Díaz <sup>2</sup> , Marcelo Cervantes <sup>2</sup>, Jerónimo García <sup>2</sup>  and Roberto Quiroz <sup>3</sup> 

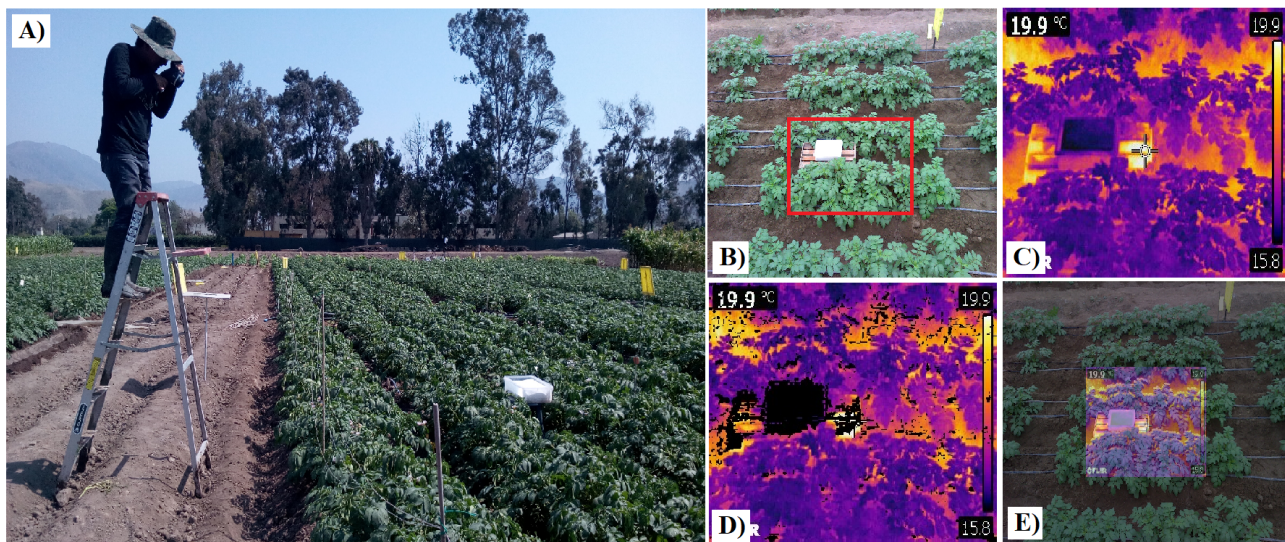

**Figure S1.** A) Thermal and RGB images acquisition using the camera FLIR model E60, according to Rinza et al' [1] procedure. B) RGB images (2048×1536 pixels). C) Thermal images (320×240 pixels). D) Thermal image filtered (mask) to avoid detection of non-plant surfaces. E) RGB and thermal images aligned to determine canopy temperature in a specific region of the plot. Thermal and RGB images processing was performed using the TIPCIIP software [2].

## References

1. Rinza, J.; Ramírez, D. A.; García, J.; De Mendiburu, F.; Yactayo, W.; Barreda, C.; Velasquez, T.; Mejía, A.; Quiroz, R. Infrared radiometry as a tool for early water deficit detection: insights into its use for establishing irrigation calendars for potatoes under humid conditions. *Potato Res.* **2019**, *62*(2), 109–122. [[CrossRef](#)]
2. Cucho-Padin, G.; Rinza, J.; Ninanya, J.; Loayza, H.; Quiroz, R.; Ramírez, D. A. Development of an open-source thermal image processing software for improving irrigation management in potato crops (*Solanum tuberosum* L.). *Sensors* **2020**, *20*(2), 472. [[CrossRef](#)]
